# Supplementary material
Source: PubMed Central journal article supplement (PMC4679053)
Supplement: pnas.1513803112.sapp.pdf [file pnas.1513803112.sapp.pdf]

## 1 SUPPORTIVE INFORMATION

### 2 Supplementary Methods

3 **Protein Expression and Purification.** The Y132A mutant HBV core protein N-terminal  
4 domain (amino acids 1-149) of HBV genotype D strain adyw was cloned into a modified  
5 pET23a Vector to produce a fusion protein with a C-terminal His6 tag and a preceding TEV  
6 protease cleavage site (CoreND-Y132A). Cells were lysed by sonication and clarified lysate  
7 was filtered, loaded onto a HiTrap Nickel Chelating column and the protein eluted using an  
8 imidazole gradient. Eluted fractions containing the target protein were combined and  
9 subjected to digestion by His6-tagged TEV protease at 4°C resulting in the final protein with  
10 residual residues KLENLYFQ on the C-terminus. Dialysis into 25 mM Tris pH 8.0, 100 mM  
11 NaCl, 0.25% v/v glycerol, 2 mM TCEP was followed by a second HiTrap Nickel Chelating  
12 column, to remove undigested material, cleaved tag, and TEV protease, while cleaved  
13 CoreND-Y132A protein was collected in the flow-through. CoreND-Y132A protein was  
14 concentrated to >15 mg/ml, then loaded onto a Sephacryl S-100 size exclusion column which  
15 was equilibrated with 50 mM Tris pH 9.0, 2 mM DTT. Mutant protein eluted as a >95% pure  
16 single peak which was concentrated to 10 mg/ml for crystallization experiments. The wild-  
17 type and the Y132A coding sequences of HBV core protein (amino acids 1-149) of HBV  
18 strain adyw were also cloned into a modified pET28 vector system which provides an N-  
19 terminal His6-SUMO tag that could be removed by cleavage with Ulp-1 protease. The  
20 purification protocols were similar as described above, and details are provided in  
21 Supplemental Methods. The purification of the wild type protein included a urea based  
22 denaturation and assembly step and a second denaturation as described originally by Zlotnick  
23 et al. <sup>1</sup>. The wild-type and Y132A mutant HBV core proteins derived from the expression  
24 with N-terminal His tags were used for biochemical experiments.

1 **Electron Microscopy.** Electron microscopy with HBV capsid formed from recombinant  
2 HBV core protein was performed as described <sup>2</sup>. Samples were adsorbed on 200 mesh copper  
3 grids coated with Formvar Carbon Film and stained with fresh 2% Uranyl Acetate. Samples  
4 were visualized on a FEI Technai T12 transmission electron microscope equipped with a  
5 2Kx2K AMT MegaPLUS ES 4.0 CCD camera. Images were typically acquired with  
6 magnification of x105000.

7 **Thermal Shift Analysis.** Protein and ligand were incubated in assay buffer at a final  
8 concentration of 4  $\mu$ M HBV core protein monomer, 25  $\mu$ M ligands, 1% DMSO. Assay buffer  
9 was either 50 mM Hepes pH 7.5, 100 mM NaCl, 2 mM DTT (for CoreND-Y132A mutant  
10 dimer protein or assembled wild-type capsid) or 50 mM NaHCO<sub>3</sub>, pH 9.2, 100 mM NaCl,  
11 2mM DTT (for CoreND wild-type dimer protein). After one hour of incubation at room  
12 temperature, 25 $\mu$ L of each reaction and 2 $\mu$ L of spiro dye was added to each well of a 96-well  
13 plate in triplicate. Melting temperatures were measured from 20-100°C over 70 minutes on a  
14 DNA Engine Opticon 2 Real-time cycler PCR (Biorad). Data were analyzed using Opticon  
15 Monitor II.

16 **Analytical Size Exclusion Chromatography.** High-performance liquid chromatography  
17 (HPLC) experiments were carried out at 4<sup>o</sup>C using an Agilent 1100 Liquid Chromatography  
18 System outfitted with a Multi Wavelength Detector (MWD) and a Superdex 200 10/300 GL  
19 column. Chromatograms were evaluated with ChemStation (Agilent Technologies). 200  $\mu$ g  
20 of purified CoreND protein were used with a mobile phase of 50 mM HEPES pH 7.5, 200  
21 mM NaCl, 2 mM DTT. Gel Filtration Standards (BioRad) were run as part of the assay and  
22 protein molecular weights were determined based on linear regression analysis of those  
23 standards.

1 **Crystallization.** Mutant protein (CoreND-Y132A) at 10mg/ml in 50mM Tris pH 9.0, 2 mM  
2 DTT was combined with reservoir solution containing 100 mM ammonium citrate/citric acid  
3 pH 6.5, 9 % isopropanol, 10 % PEG 3350 supplemented with 10 % MPD at a 2:1 volume  
4 ratio at 20°C. Thick hexagonal plates grew within 3 days. Crystals formed in space group C2  
5 with cell dimensions  $a=152.6$ ,  $b=88.2$ ,  $c=102.25$ ,  $\beta=131.5$  and contain six capsid monomers  
6 in the asymmetric unit. The crystals diffracted at a synchrotron to  $\sim 3.0\text{\AA}$ ; however when  
7 soaked overnight with compound NR 010-001-E2, the diffraction improved to  $1.95\text{\AA}$ . Data  
8 was collected at APS Beamline 21-IDf (LS-CAT). Data were reduced with xds, scaled with  
9 xscale <sup>3</sup>, solved by molecular replacement using 4BMG as a probe, refined in ccp4 using  
10 re mac 5.0 <sup>4</sup>, and rebuilt as needed with Coot <sup>5</sup>. The core protein was built through residue  
11 Val148. Final data collection and refinement statistics are summarized in Table 1.

12 **Antiviral assays.** HepG2.2.15 cells (Fox Chase Cancer Center, Philadelphia, PA) were  
13 maintained in DMEM with 10% fetal bovine serum, 100 units/ml penicillin, 100  $\mu\text{g/ml}$   
14 streptomycin, 2 mM L-glutamine and 380  $\mu\text{g/ml}$  G418. Cells were seeded in 96-well plates at  
15 a density of 40,000 cells/well, and treated with half-log serially diluted compounds at a final  
16 DMSO concentration of 0.5%. Cells were incubated with compounds for three days, after  
17 which medium was removed and fresh medium containing compounds was added to cells for  
18 another three days. At day 6, cell culture supernatant was removed and treated with 2 units of  
19 Turbo DNase (Invitrogen) at 37°C for 60 minutes, followed by inactivation of the enzyme at  
20 75°C for 15 minutes. Encapsidated HBV DNA was released from the virions and covalently  
21 linked HBV polymerase by incubating in lysis buffer with 2.5  $\mu\text{g}$  proteinase K (Promega) and  
22 detected by branched DNA assay using the QuantiGene assay kit and HBV DNA probes  
23 according to manufacturer recommendation (Affymetrix). The mean background signal from  
24 wells containing only culture medium was subtracted from all other samples, and percent  
25 inhibition was calculated by normalizing to signals from HepG2.2.15 cells treated with 0.5%

1 DMSO. EC<sub>50</sub> values were determined from the percent inhibition data obtained at different  
2 compound concentrations by non-linear fitting using Graphpad Prism software.

3 **Transient transfection phenotyping.** Plasmid DNA containing a 1.1x genotype B HBV  
4 genome under the control of a CMV promoter was previously cloned from serum of an HBV  
5 infected patient (Genbank AY220698, Fudan University, China) <sup>6</sup>. HBV core variants,  
6 W102G/R, I105V/L/T, T109S/M/I, and Y118F, were generated by site directed mutagenesis  
7 according to manufacturer recommendation (Agilent Technologies). The full length genome  
8 was sequenced to confirm that only the intended nucleotide changes were present in the final  
9 constructs. HepG2 cells (ATCC) maintained in DMEM containing 10% fetal bovine serum,  
10 100 units/mL penicillin, 10 µg/mL streptomycin, and 0.25 µg/mL of Fungizone were seeded  
11 in collagen coated 96-well plates at a density of 20,000 cells/well and allowed to attach  
12 overnight at 37°C and 5% CO<sub>2</sub>. Cells were co-transfected with HBV (100 ng/well) and  
13 *Gaussia* luciferase reporter expression plasmids (10 ng/well) (Thermo Scientific) using the  
14 Lipofectamine LTX Plus transfection reagent. Transfection mixtures were removed the  
15 following day, and cells were treated with serially diluted compounds for three days at a final  
16 DMSO concentration of 0.5%, after which intracellular encapsidated HBV DNA was  
17 extracted from cells and levels of secreted *Gaussia* luciferase was determined from the  
18 medium using the *Gaussia* Flash Luciferase assay kit (Thermo Scientific). Briefly, cells were  
19 washed once with Dulbecco's phosphate-buffered saline and lysed with 0.33% NP-40. Nuclei  
20 were pelleted by centrifugation and supernatant containing HBV DNA was treated with  
21 Turbo DNase and S7 nuclease at 37°C for 60 minutes, followed by inactivation of the  
22 enzymes at 75°C for 15 minutes. Encapsidated HBV DNA was detected by branched DNA  
23 assay using the QuantiGene assay kit and HBV DNA probes as described above. To  
24 determine the replication competence of HBV core variants, the background corrected values  
25 for HBV DNA from the QuantiGene assay were normalized using the *Gaussia* luciferase

1 activity values in order to account for any differences in transfection efficiency. The  
 2 normalized HBV DNA values obtained from cells transfected with HBV variants were then  
 3 compared with those obtained from the wild type HBV transfection, with wild-type HBV  
 4 replication competence set at 100%.

5

6 **Supplementary Table 1:** Conservation of amino acids within 5 Å of bound NVR 010-001-  
 7 E2 based on a sequence database of 2800 publicly available distinct HBV core protein  
 8 sequences across all HBV genotypes.

| Protein chain <sup>a</sup> | Amino acid position | Amino acid | % Conservation |
|----------------------------|---------------------|------------|----------------|
| F                          | 23                  | Phe        | 99.5           |
| F                          | 25                  | Pro        | 99.7           |
| F                          | 29                  | Asp        | 99.0           |
| F                          | 30                  | Leu        | 99.5           |
| F                          | 33                  | Thr        | 99.6           |
| F                          | 37                  | Leu        | 99.6           |
| F                          | 102                 | Trp        | 99.5           |
| F                          | 105                 | Ile        | 94.2           |
| F                          | 106                 | Ser        | 99.9           |
| F                          | 109                 | Thr        | 96.9           |
| F                          | 110                 | Phe        | 99.8           |
| F                          | 118                 | Tyr        | 99.2           |
| F                          | 122                 | Phe        | 99.7           |
| F                          | 139                 | Ile        | 99.9           |
| F                          | 140                 | Leu        | 99.9           |
| F                          | 141                 | Ser        | 99.8           |
| A                          | 124                 | Val        | 99.8           |
| A                          | 125                 | Trp        | 99.8           |
| A                          | 127                 | Arg        | 99.6           |
| A                          | 128                 | Thr        | 99.6           |
| A                          | 129                 | Pro        | 99.9           |
| A                          | 132                 | Ala        | 99.8           |
| A                          | 133                 | Arg        | 99.8           |
| A                          | 134                 | Pro        | 99.8           |

9 <sup>a</sup> Structural analysis based on the compound binding site between A and F monomers of the core  
 10 protein hexamer

11

1

2

3 **Supplementary Table 2:** HBV core sequence analysis across 2800 public sequences of  
4 genotypes A-H.

| GT <sup>a</sup> | n <sup>b</sup> | Residue 105 (%) <sup>c</sup>                  | Residue 109 (%) <sup>c</sup>      | Residue 102 (%) <sup>c</sup> | Residue 118 (%) <sup>c</sup> |
|-----------------|----------------|-----------------------------------------------|-----------------------------------|------------------------------|------------------------------|
| <b>A – H</b>    | 2800           | I(94.2), V(2.5),<br>L(1.7), T(1.4)<br>S/F/M/N | T(96.9), M(1.9)<br>I/S/C/A/N      | W(99.5)<br>G/R               | Y(99.2)<br>F/N/E             |
| <b>A</b>        | 355            | I(94.0), T(3.7)<br>S/L/V                      | T(98.3)<br>M/A/S/C/I              | W(98.6), R(1.1)<br>G         | Y(98.9), F(1.1)              |
| <b>B</b>        | 588            | I(94.0), L(2.9),<br>V(2.7)<br>T/M             | T(94.9), M(2.7),<br>I(1.2)<br>S/C | W(99.8)<br>G                 | Y(99.3)<br>F                 |
| <b>C</b>        | 772            | I(97.2), V(1.4),<br>L(1.3)<br>N               | T(98.8), M(1.0)<br>S              | W(99.6)<br>G/R               | Y(99.9)<br>E                 |
| <b>D</b>        | 790            | I(94.6), V(4.8),<br>T(2.5), L(1.7)<br>F       | T(95.6), M(2.8)<br>S/I/A/N/C      | W(99.8)<br>G                 | Y(99.0)<br>F/N               |
| <b>E</b>        | 205            | I(94.3), T(2.4),<br>V(2.0)<br>F/L             | T(98.1), M(1.5)<br>I              | W(98.5), G(1.5)              | Y(98.1), F(2.0)              |
| <b>F</b>        | 54             | I(96.2), L(3.8)                               | T(94.3), M(3.8),<br>S(1.9)        | W(98.2), G(1.9)              | Y(98.2), F(1.9)              |
| <b>G</b>        | 16             | I(100)                                        | T(100)                            | W(100)                       | Y(100)                       |
| <b>H</b>        | 20             | I(100)                                        | T(100)                            | W(100)                       | Y(100)                       |

5 <sup>a</sup>HBV genotype6 <sup>b</sup>Number of sequences analyzed7 <sup>c</sup>Amino acids reported in the sequence database at this position; brackets show the percentage prevalence of a  
8 particular amino acid at this position, if it exceeded 1%

9

10

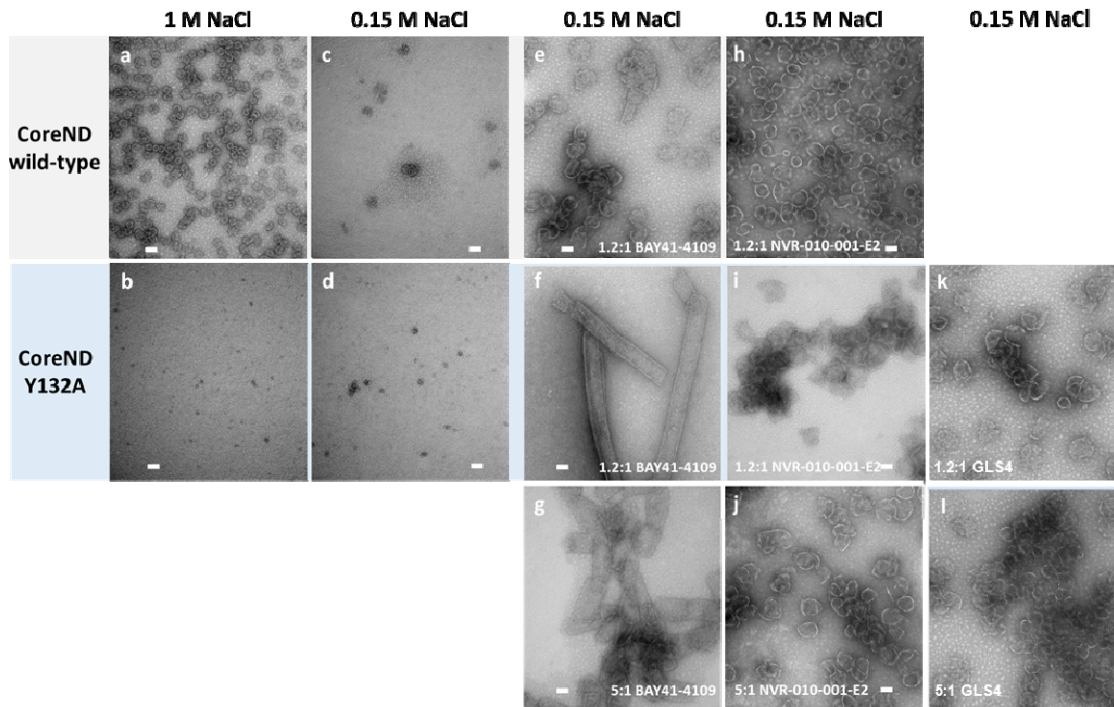

1

2 **Supplementary Figure 1**

3 Electron microscopy of wildtype HBV core protein (top row) and Y132A mutant HBV core protein at  
 4 10  $\mu$ M monomer concentration; **a),b)** Protein in the presence of 1M NaCl; **c),d)** Protein in the  
 5 presence of 0.15M NaCl; **e),f),h),i),k)** Protein in the presence of 0.15M NaCl and 1.2-fold excess of  
 6 either BAY 41-4109, NVR-010-001-E2 or GLS4 as indicated; **g),j),l)** Protein in the presence of  
 7 0.15M NaCl and 5-fold excess of either BAY 41-4109, NVR-010-001-E2 or GLS4 as indicated.

8

9

10

11

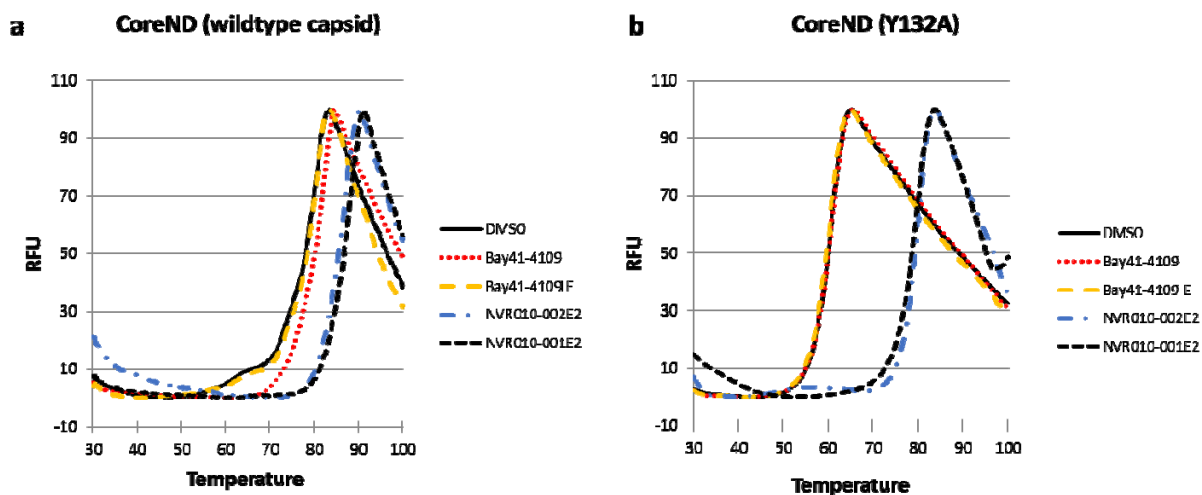

1

2 **Supplementary Figure 2**

3 Core inhibitors can thermostabilize preformed HBV capsids and Y132A mutant HBV core protein. **a)**  
 4 Thermal shift assay using wild-type HBV capsid formed from CoreND protein; **b)** thermal shift assay  
 5 using CoreND-Y132A protein. Temperature induced unfolding in the absence of compound (DMSO,  
 6 black, solid line), in the presence of BAY 41-4109-IE (orange, wide dashed line), BAY 41-4109 (red,  
 7 dotted line), GLS4 (NVR-010-002-E2, blue, dotted-dashed line), NVR-010-001-E2 (black, dashed  
 8 line).



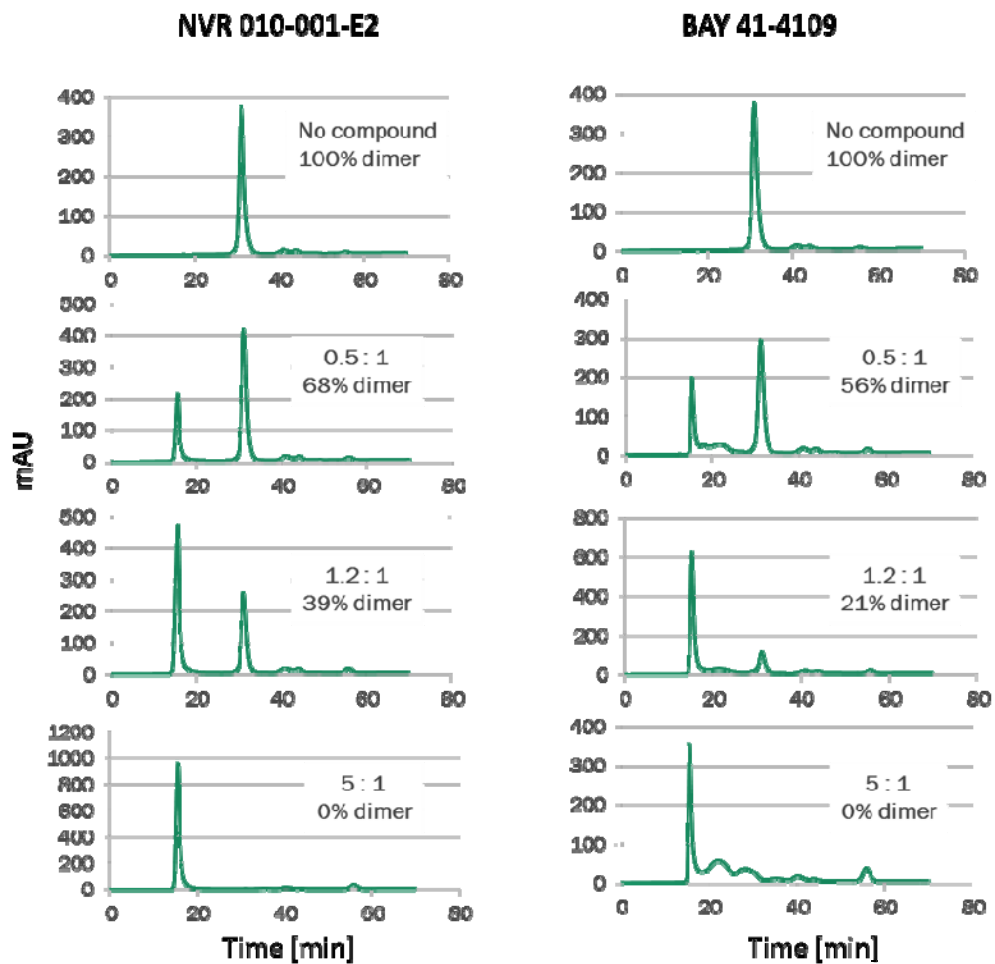

1

2 **Supplementary Figure 3**

3 Analytical size exclusion chromatography (anSEC) of CoreND-Y132A protein alone or in the  
4 presence of different ratios of core inhibitors NVR 010-001-E2 or BAY 41-4109 relative to CoreND-  
5 Y132A protein monomer as indicated on the graphs. In the presence of 5:1 compound to protein  
6 monomer ratio, all of the dimer is assembled into larger structures that elute early from the size  
7 exclusion column.

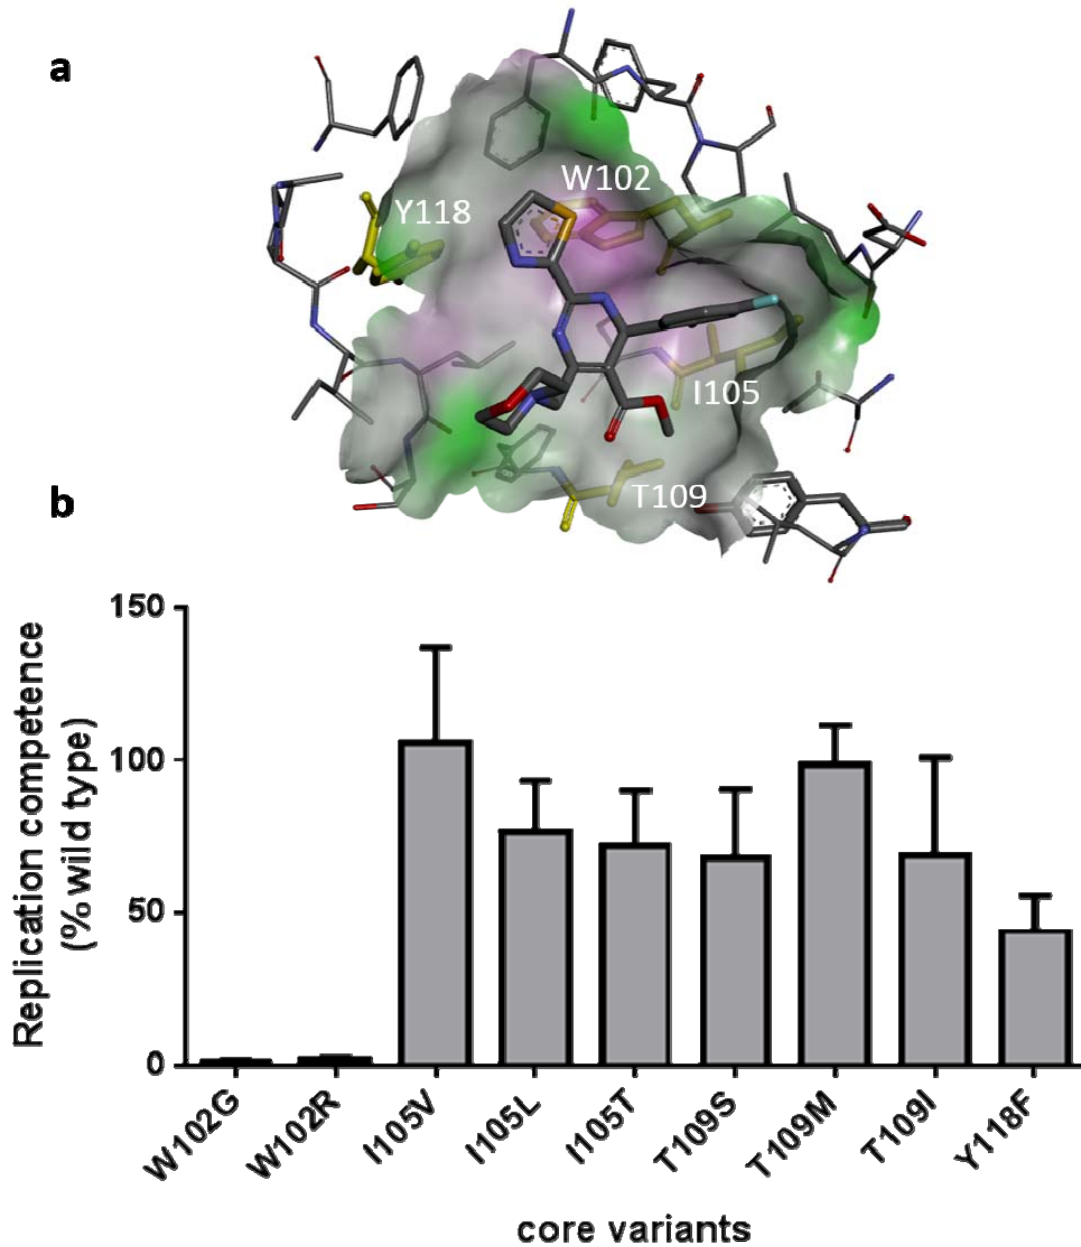

1

2 **Supplementary Figure 4**

3 Evaluation of core variants at polymorphic sites near the bound ligand. **a)** Location of the four amino  
 4 acids (colored yellow) with variants occurring at >1% frequency in any genotype (A-H). **b)**  
 5 Replication competence of naturally occurring core variants determined by transient transfection  
 6 studies in HepG2 cells. Intracellular encapsidated HBV DNA levels were normalized for transfection  
 7 efficiency using secreted Gaussia Luciferase and compared to DNA levels obtained with wild type  
 8 HBV. Results shown are mean values and Standard Deviation error bars, determined from at least  
 9 three independent studies.

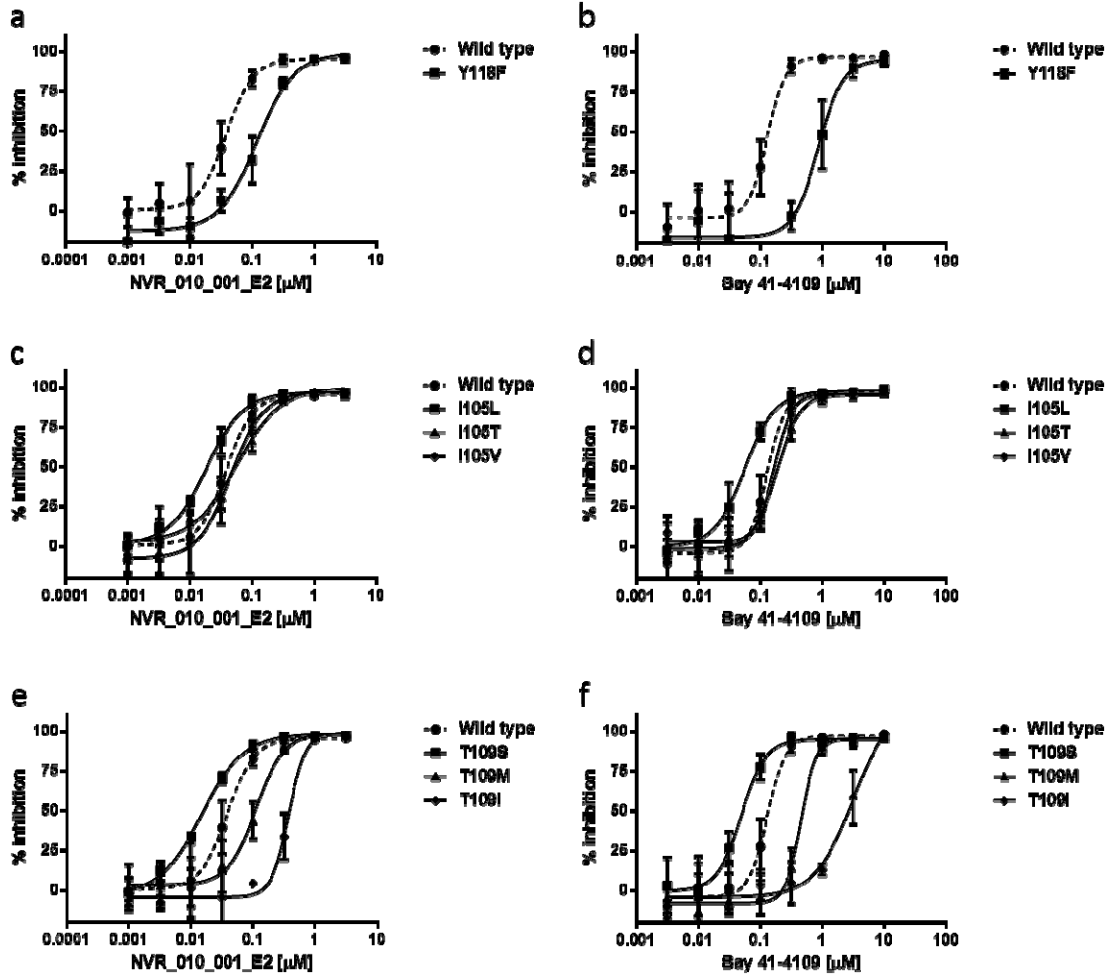

1

2 **Supplementary Figure 5**

3 Effect of HBV core protein variants on antiviral activities of NVR\_010\_001\_E2 (**a c, e**) or BAY 41-  
 4 4109 (**b, d, f**). HepG2 cells transfected with HBV plasmids were incubated with increasing  
 5 concentrations of core modulators for 3 days and intracellular encapsidated HBV DNA levels were  
 6 measured and normalized to untreated controls. Data points shown are mean values and error bars are  
 7 Standard Deviations determined from at least three independent studies..

8

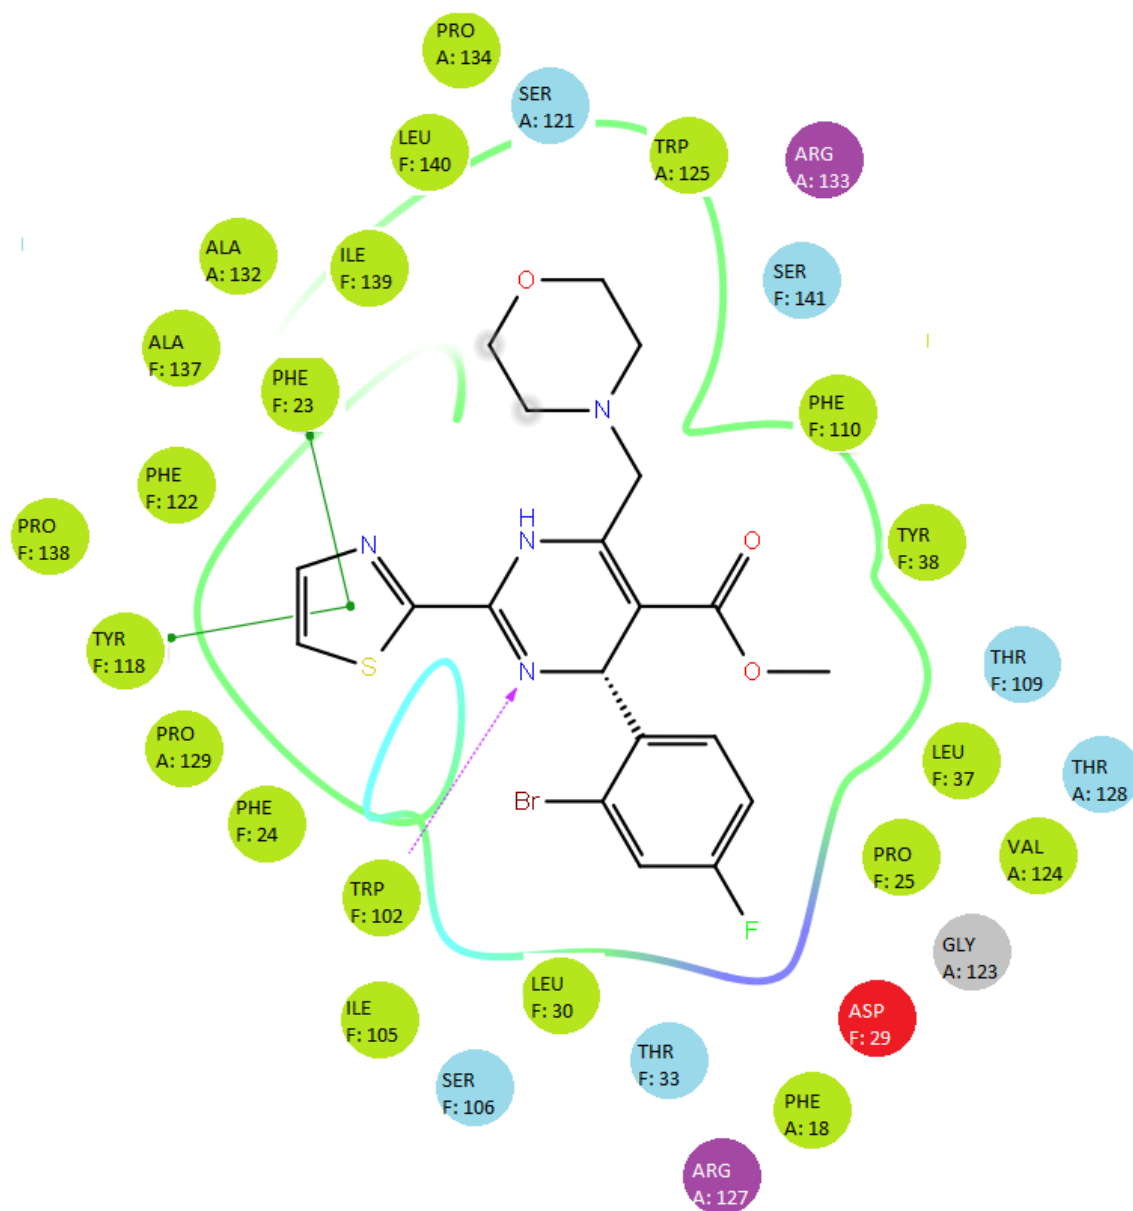

1

2 **Supplementary Figure 6**

3 2D view of the interactions of NVR 010-001-E2 with the binding pocket formed by A (lid)  
 4 (contact domain) core protein monomers. Hydrophobic residues are shown in green, polar in blue,  
 5 negatively charged in red, positively charged in purple and glycine in grey. Hydrogen bond to Trp 102  
 6 is shown with a purple arrow and aromatic stacking with green lines

7

## References

1. Zlotnick, A. et al. In vitro screening for molecules that affect virus capsid assembly (and other protein association reactions). *Nat. Protoc.* **2**, 490-8 (2007).
2. Zlotnick, A., Ceres, P., Singh, S. & Johnson, J.M. A small molecule inhibits and misdirects assembly of hepatitis B virus capsids. *J Virol* **76**, 4848-54 (2002).
3. Kabsch W (2010) XDS. *Acta Crystallogr D Biol Crystallogr* 66(Pt 2):125-132.
4. Murshudov GN, Vagin AA, Lebedev A, Wilson KS, & Dodson EJ (1999) Efficient anisotropic refinement of macromolecular structures using FFT. *Acta Crystallogr D Biol Crystallogr* 55(Pt 1):247-255.
5. Emsley P, Lohkamp B, Scott WG, & Cowtan K (2010) Features and development of Coot. *Acta Crystallogr D Biol Crystallogr* 66(Pt 4):486-501.
6. Zhang JM, et al. (2005) High replicative full-length lamivudine-resistant hepatitis B virus isolated during acute exacerbations. *J Med Virol* 77(2):203-208.
